# Supplementary material
Source: HighWire-hosted journal article supplement (https://annals.highwire.org/content/suppl/2005/12/16/143.12.849)
Supplement: Sherman_AF_143-12-849-DC1-1.pdf [file Sherman_AF_143-12-849-DC1-1.pdf]

Appendix Figure. Yoga postures.

Yoga Postures

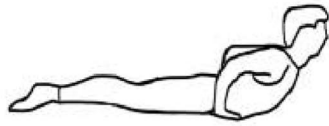

#1 Cobra Posture

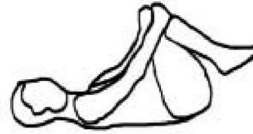

#2 Knee to Chest Posture

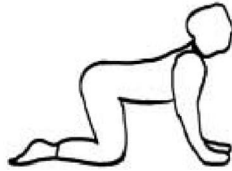

#3 Wheel Posture

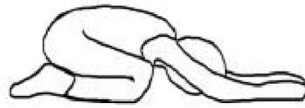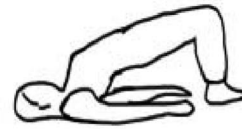

#4 Bridge Posture

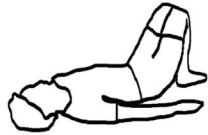

#5 Supine Butterfly

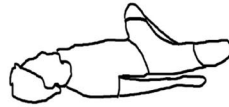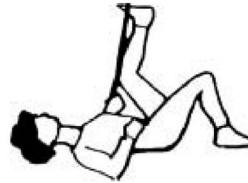

#6 Extended Leg Posture

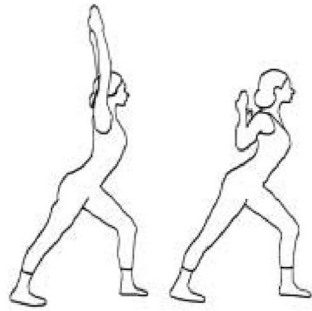

#7 Warrior Posture

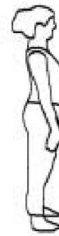

#8 Standing Forward Bend

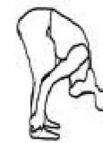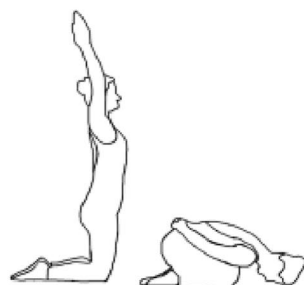

#9 Kneeling Forward Bend

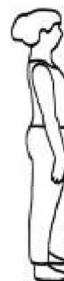

#10 Chair Posture

Appendix Figure. Yoga postures.

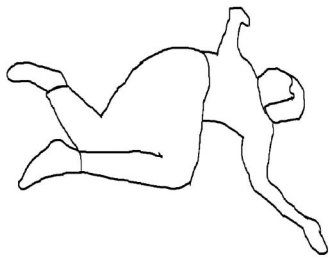

#11 Lying Twist

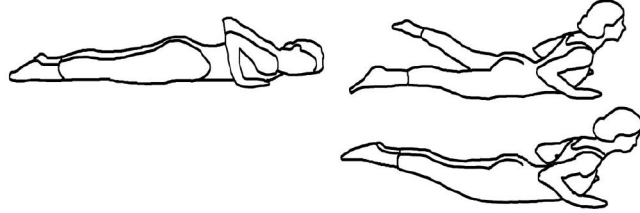

#12 Swimmer's Posture

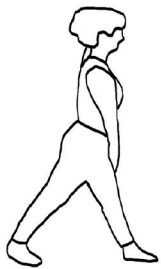

#13 Extended Side Stretch

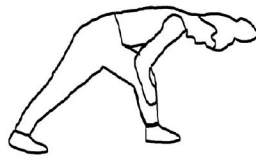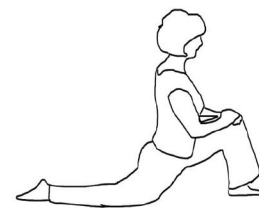

#14 Lunge

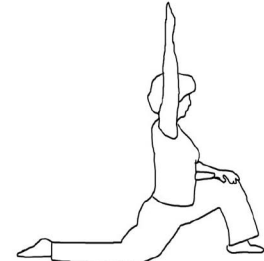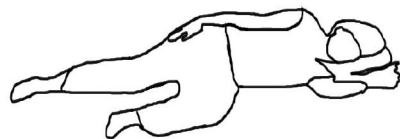

#15 Lying Side Hip Strengtheners

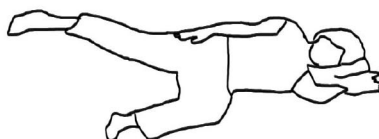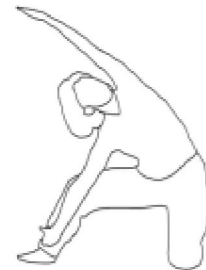

#16 Kneeling Lateral Posture

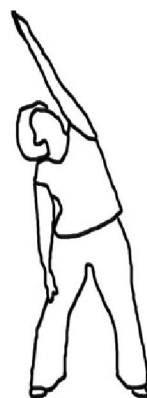

#17 Standing Lateral Posture
